# Supplementary material for: Sex-specific microRNA expression networks in an acute mouse model of ozone-induced lung inflammation
Source: Biol Sex Differ. 2018 May 8;9:18. doi: 10.1186/s13293-018-0177-7 (PMC5941588; doi:10.1186/s13293-018-0177-7)
Supplement: Supplementary file 1 — Figure S1. Sex differences in inflammatory miRNA expression. A. Cluster analysis of 84 inflammatory miRNAs in lung extracts from male and female mice. B. Individual expression of miRNAs differentially expressed in lung tissue from males vs. females. M, males (n = 6); F females (n = 23). FA_M males exposed to filtered air, FA_D1 females exposed to filtered air in diestrus 1, FA_D2 females exposed to filtered air in diestrus 2, FA_P females exposed to filtered air in proestrus, FA_E females exposed to filtered air in estrus. (PDF 320 kb) [file 13293_2018_177_MOESM1_ESM.pdf]

Heatmap showing the correlation of FA values between different brain regions. The color scale ranges from -3 (dark blue) to 4 (dark red). The regions are grouped into four categories: FA\_M (Fibre Assignment), FA\_P (Fibre Assignment), FA\_D1 (Fibre Assignment), and FA\_D2 (Fibre Assignment). The heatmap shows a complex pattern of positive and negative correlations across the regions.

Figure 2 shows two box plots comparing the expression of mmu-miR-466k and mmu-miR-222-3p between FA\_F and FA\_M groups. The y-axis represents 'expression'. The x-axis has two categories: FA\_F and FA\_M. A legend indicates F (green) and M (orange). The p-value for mmu-miR-466k is 0.031, and for mmu-miR-222-3p is 0.047.
